# Supplementary material
Source: PubMed Central journal article supplement (PMC6759591)
Supplement: NIHMS1050729-supplement-Supplement.pdf [file NIHMS1050729-supplement-Supplement.pdf]

## Supplementary Online Content

Gander JC, Zhang X, Ross K, et al. Association between dialysis facility ownership and access to kidney transplantation. *JAMA*. doi:10.1001/jama.2019.12803

- eFigure.** Geographic distribution of US dialysis facilities by dialysis facility ownership (n=6,511) obtained from the Dialysis Facility Compare, 2016
- eTable 1.** Patient and facility demographic characteristics of patients with ESRD at the time of dialysis start within the United States Renal Data System, 2000-2016, stratified by whether or not the patient changed dialysis facilities based on their first and last facility
- eTable 2.** Fully adjusted hierarchical Cox proportional hazard ratios between placement on the deceased donor kidney transplant waitlist, receipt of a living donor kidney transplant, or deceased donor kidney transplant and whether or not a patient changed dialysis facilities and facility profit status
- eTable 3.** Crude and adjusted hierarchical Cox proportional hazard ratios between placement on the deceased donor kidney transplant waitlist, receipt of a living donor kidney transplant, or deceased donor kidney transplant and dialysis facility ownerships by patient-level and facility-level characteristics, among ideal kidney transplantation candidates, 2000-2016 (n=454,726)
- eTable 4.** Fully adjusted hierarchical Cox proportional hazard ratios between placement on the deceased donor kidney transplant waitlist, receipt of a living donor kidney transplant, or deceased donor kidney transplant by patient-level and facility-level characteristics, stratified by end stage renal disease network region, 2000-2016
- eTable 5.** Crude and adjusted hierarchical Cox proportional hazard ratios between placement on the deceased donor kidney transplant waitlist, receipt of a living donor kidney transplant, or deceased donor kidney transplant by patient-level and facility-level characteristics for dialysis facilities that are (vs are not) affiliated with transplant centers, 2000-2016
- eTable 6.** Crude and adjusted hierarchical Cox proportional hazard ratios between placement on the deceased donor kidney transplant waitlist, receipt of a living donor kidney transplant, or deceased donor kidney transplant by patient-level and facility-level characteristics for dialysis facilities that are (vs are not) affiliated with hospitals, 2000-2016

This supplementary material has been provided by the authors to give readers additional information about their work.

**eFigure.** Geographic distribution of U.S. dialysis facilities by dialysis facility ownership (n=6,511) obtained from the Dialysis Facility Compare, 2016.

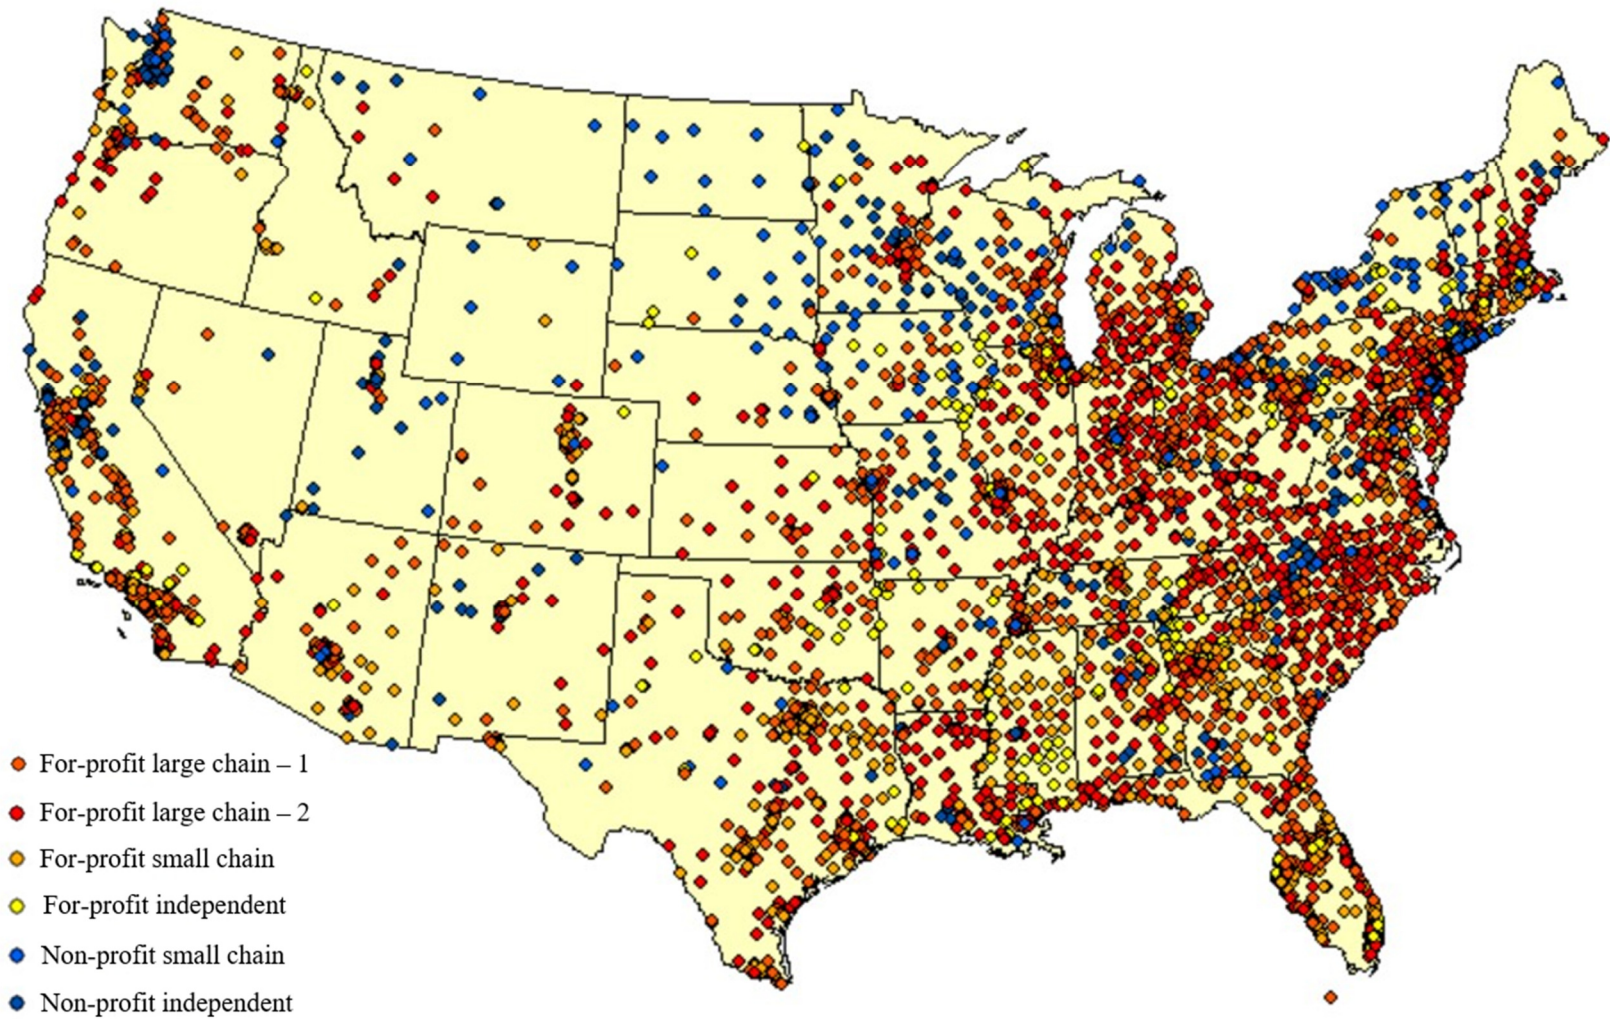

**eTable 1.** Patient and facility demographic characteristics of patients with ESRD at the time of dialysis start within the United States Renal Data System, 2000-2016, stratified by whether or not the patient changed dialysis facilities based on their first and last facility.

| Characteristics <sup>a</sup>                                                        | Total Population | Did not switch dialysis facilities | Changed dialysis facilities and remained within the same profit status | Changed dialysis facilities from for-profit to nonprofit facility | Changed dialysis facilities from nonprofit to for-profit facility |
|-------------------------------------------------------------------------------------|------------------|------------------------------------|------------------------------------------------------------------------|-------------------------------------------------------------------|-------------------------------------------------------------------|
| Patient, No.                                                                        | 1,478,564        | 1,135,502 (76.8%)                  | 282,885 (19.1%)                                                        | 16,431 (1.1%)                                                     | 43,746 (3.0%)                                                     |
| Months between starting first facility and last facility, median (IQR)              | 0 (0, 0)         | 0 (0, 0)                           | 14.3 (3.9, 35.9)                                                       | 14.7 (4.3, 35.9)                                                  | 14.5 (2.8, 41.5)                                                  |
| Placement on the deceased donor kidney transplant waiting list, n (%)               | 121,680 (8.2)    | 104,904 (9.2)                      | 2,805 (1.0)                                                            | 15 (0.1)                                                          | 13,956 (31.9)                                                     |
| Receipt of a living donor kidney transplant, n (%)                                  | 23,762 (1.6)     | 19,957 (1.8)                       | 1,773 (0.6)                                                            | 96 (0.6)                                                          | 1,936 (4.4)                                                       |
| Receipt of a deceased donor kidney transplant, n (%)                                | 49,290 (3.3)     | 41,574 (3.7)                       | 2,790 (1.0)                                                            | 103 (0.6)                                                         | 4,823 (11.0)                                                      |
| <b><i>Patient-level characteristics at start of dialysis<sup>a</sup>, n (%)</i></b> |                  |                                    |                                                                        |                                                                   |                                                                   |
| Age, years, median (IQR)                                                            | 66 (55, 76)      | 66 (55, 76)                        | 65 (54, 74)                                                            | 66.5 (55, 76)                                                     | 59 (48, 70)                                                       |
| Age Group, n (%)                                                                    |                  |                                    |                                                                        |                                                                   |                                                                   |
| 18-29                                                                               | 31,745 (2.2)     | 22,612 (2.1)                       | 5,630 (2.0)                                                            | 295 (1.8)                                                         | 2,208 (5.0)                                                       |
| 30-39                                                                               | 67,186 (4.5)     | 49,217 (4.3)                       | 13,686 (4.8)                                                           | 731 (4.4)                                                         | 3,552 (8.1)                                                       |
| 40-49                                                                               | 143,339 (10.0)   | 105,681 (9.3)                      | 29,543 (10.4)                                                          | 1,544 (9.4)                                                       | 6,571 (15.0)                                                      |
| 50-59                                                                               | 268,858 (18.2)   | 201,600 (17.8)                     | 54,480 (19.3)                                                          | 32,909 (17.7)                                                     | 9,869 (22.6)                                                      |
| 60-69                                                                               | 364,820 (24.7)   | 279,026 (24.7)                     | 71,611 (25.3)                                                          | 4,012 (24.4)                                                      | 10,171 (23.3)                                                     |
| ≥70                                                                                 | 602,616 (40.8)   | 476,366 (42.0)                     | 107,935 (38.2)                                                         | 6,940 (42.2)                                                      | 11,375 (26.0)                                                     |
| Sex, n (%)                                                                          |                  |                                    |                                                                        |                                                                   |                                                                   |
| Male                                                                                | 818,096 (55.3)   | 630,309 (55.5)                     | 153,806 (54.4)                                                         | 8,989 (54.7)                                                      | 24,992 (57.1)                                                     |
| Female                                                                              | 660,468 (44.7)   | 505,193 (44.5)                     | 129,079 (45.6)                                                         | 7,442 (45.3)                                                      | 18,754 (42.9)                                                     |
| Race and Ethnicity, n (%)                                                           |                  |                                    |                                                                        |                                                                   |                                                                   |
| White, non-Hispanic                                                                 | 805,905 (54.5)   | 625,875 (55.1)                     | 149,954 (53.0)                                                         | 9,692 (59.0)                                                      | 20,384 (46.6)                                                     |
| White, Hispanic                                                                     | 178,763 (12.1)   | 135,867 (12.0)                     | 35,485 (12.5)                                                          | 1,358 (8.3)                                                       | 6,053 (13.8)                                                      |
| Black, non-Hispanic                                                                 | 178,763 (12.1)   | 312,926 (27.6)                     | 83,049 (29.4)                                                          | 4,334 (26.4)                                                      | 15,044 (34.3)                                                     |
| Other <sup>b</sup>                                                                  | 78,543 (5.3)     | 60,834 (5.4)                       | 14,397 (5.1)                                                           | 1,047 (6.4)                                                       | 2,265 (5.2)                                                       |
| Insurance Coverage, n (%)                                                           |                  |                                    |                                                                        |                                                                   |                                                                   |

|                          |                |                |                |              |               |
|--------------------------|----------------|----------------|----------------|--------------|---------------|
| (115,322 (7.8%) missing) |                |                |                |              |               |
| Medicare                 | 542,921 (39.8) | 420,980 (40.3) | 103,271 (39.6) | 6,347 (42.0) | 12,323 (29.7) |

| Characteristics <sup>a</sup>                                                                                | Total Population | Did not switch dialysis facilities | Changed dialysis facilities and remained within the same profit status | Changed dialysis facilities from for-profit to nonprofit facility | Changed dialysis facilities from nonprofit to for-profit facility |
|-------------------------------------------------------------------------------------------------------------|------------------|------------------------------------|------------------------------------------------------------------------|-------------------------------------------------------------------|-------------------------------------------------------------------|
| Medicaid                                                                                                    | 377,827 (27.7)   | 288,788 (27.6)                     | 74,276 (28.5)                                                          | 4,188 (27.7)                                                      | 10,575 (25.5)                                                     |
| Employer group                                                                                              | 239,678 (17.6)   | 184,596 (17.6)                     | 43,762 (16.8)                                                          | 2,571 (17.0)                                                      | 8,749 (21.1)                                                      |
| No coverage                                                                                                 | 99,553 (7.3)     | 75,256 (7.2)                       | 21,047 (8.1)                                                           | 920 (6.1)                                                         | 6,040 (14.6)                                                      |
| Other coverage                                                                                              | 103,263 (7.6)    | 76,302 (7.3)                       | 18,428 (7.1)                                                           | 1,070 (17.0)                                                      | 3,753 (9.1)                                                       |
| <b>Attribute Cause of ESRD, n (%)</b>                                                                       |                  |                                    |                                                                        |                                                                   |                                                                   |
| Diabetes                                                                                                    | 694,455 (47.0)   | 527,133 (46.4)                     | 140,090 (49.5)                                                         | 7,996 (48.7)                                                      | 19,236 (44.0)                                                     |
| Hypertension                                                                                                | 439,480 (29.7)   | 337,437 (29.7)                     | 85,949 (30.4)                                                          | 4,814 (29.3)                                                      | 11,280 (25.8)                                                     |
| Other                                                                                                       | 236,794 (16.0)   | 187,911 (16.5)                     | 38,311 (13.5)                                                          | 2,516 (15.3)                                                      | 8,056 (18.4)                                                      |
| Glomerulonephritis                                                                                          | 107,835 (7.3)    | 83,021 (7.3)                       | 18,535 (6.6)                                                           | 1,105 (6.7)                                                       | 5,174 (11.8)                                                      |
| <b>Dialysis Type<sup>c</sup>, n (%)</b>                                                                     |                  |                                    |                                                                        |                                                                   |                                                                   |
| Hemodialysis                                                                                                | 1,340,123 (91.1) | 1,034,453 (91.7)                   | 252,101 (89.1)                                                         | 15,202 (92.5)                                                     | 38,367 (87.7)                                                     |
| Peritoneal dialysis                                                                                         | 108,819 (7.4)    | 81,869 (7.3)                       | 21,771 (7.7)                                                           | 1,023 (6.2)                                                       | 4,156 (9.5)                                                       |
| Other                                                                                                       | 21,817 (1.5)     | 11,375 (1.0)                       | 9,013 (3.2)                                                            | 206 (1.3)                                                         | 1,223 (2.8)                                                       |
| <b>Patient-level comorbidities at start of dialysis and access to transplant metrics<sup>a</sup>, n (%)</b> |                  |                                    |                                                                        |                                                                   |                                                                   |
| BMI >35 kg/m <sup>2</sup>                                                                                   | 275,833 (18.7)   | 207,009 (18.2)                     | 57,429 (20.3)                                                          | 3,149 (19.2)                                                      | 8,246 (18.9)                                                      |
| Congestive heart failure                                                                                    | 490,683 (33.2)   | 382,872 (33.7)                     | 90,486 (32.0)                                                          | 5,334 (32.5)                                                      | 11,991 (27.4)                                                     |
| Atherosclerotic heart disease                                                                               | 205,331 (13.9)   | 160,599 (14.1)                     | 37,019 (13.1)                                                          | 2,336 (14.2)                                                      | 5,377 (12.3)                                                      |
| Other cardiac disease                                                                                       | 206,715 (14.0)   | 162,286 (14.3)                     | 37,517 (13.3)                                                          | 2,209 (13.4)                                                      | 4,703 (10.8)                                                      |
| Cerebrovascular disease                                                                                     | 143,362 (9.7)    | 111,751 (9.8)                      | 26,412 (9.3)                                                           | 1,620 (10.0)                                                      | 3,579 (8.2)                                                       |
| Peripheral vascular disease                                                                                 | 198,760 (13.4)   | 156,006 (13.7)                     | 35,978 (12.7)                                                          | 2,219 (13.5)                                                      | 4,557 (10.4)                                                      |
| Hypertension                                                                                                | 1,247,373 (84.4) | 954,959 (84.1)                     | 241,565 (85.4)                                                         | 13,674 (83.2)                                                     | 37,175 (85.0)                                                     |
| Diabetes                                                                                                    | 710,345 (48.0)   | 542,381 (47.8)                     | 141,188 (50.0)                                                         | 7,877 (48.0)                                                      | 18,899 (43.2)                                                     |
| Chronic obstructive pulmonary disease                                                                       | 142,639 (9.7)    | 113,322 (10.0)                     | 24,832 (8.8)                                                           | 1,488 (9.1)                                                       | 2,997 (6.9)                                                       |
| Tobacco use                                                                                                 | 92,390 (6.3)     | 70,249 (6.2)                       | 18,268 (6.5)                                                           | 1,016 (6.2)                                                       | 2,857 (6.5)                                                       |
| Cancer                                                                                                      | 275,833 (18.7)   | 207,009 (18.2)                     | 57,429 (20.3)                                                          | 3,149 (19.2)                                                      | 8,246 (18.9)                                                      |
| Pre-ESRD Nephrology Care (546,900 (37.0% missing))                                                          | 622,983 (66.9)   | 481,935 (67.0)                     | 117,047 (66.5)                                                         | 6,651 (67.1)                                                      | 17,350 (65.3)                                                     |

| Characteristics <sup>a</sup>                                             | Total Population     | Did not switch dialysis facilities | Changed dialysis facilities and remained within the same profit status | Changed dialysis facilities from for-profit to nonprofit facility | Changed dialysis facilities from nonprofit to for-profit facility |
|--------------------------------------------------------------------------|----------------------|------------------------------------|------------------------------------------------------------------------|-------------------------------------------------------------------|-------------------------------------------------------------------|
| Patients not informed of transplant due to medical reasons, median (IQR) | 80,085 (5.4)         | 64,555 (5.7)                       | 12,425 (4.4)                                                           | 788 (4.8)                                                         | 2,317 (5.3)                                                       |
| Years on dialysis until event, median (IQR)                              |                      |                                    |                                                                        |                                                                   |                                                                   |
| Placement on waiting list <sup>d</sup>                                   | 2.0 (0.7, 4.2)       | 1.7 (0.6, 3.8)                     | 3.1 (1.5, 5.5)                                                         | 3.1 (1.5, 5.4)                                                    | 2.5 (1.1, 5.0)                                                    |
| First transplant <sup>e</sup>                                            | 2.2 (0.8, 4.5)       | 1.9 (0.6, 4.1)                     | 3.1 (1.5, 5.4)                                                         | 3.0 (1.5, 5.3)                                                    | 3.5 (1.7, 6.1)                                                    |
| <b><i>Dialysis facility-level characteristics</i></b>                    |                      |                                    |                                                                        |                                                                   |                                                                   |
| Number of patients per facility, median (IQR)                            | 35 (10, 93)          | 140 (63, 245)                      | 37 (21, 58)                                                            | 17 (9, 29)                                                        | 5 (2, 10)                                                         |
| Number of social workers per facility, median (IQR)                      | 1 (0, 1)             | 1 (0, 1)                           | 1 (0, 1)                                                               | 1 (0, 1)                                                          | 1 (0, 1)                                                          |
| Ratio of patients to social workers per facility, median (IQR)           | 6 (0, 63)            | 68 (0, 224)                        | 20 (0, 53)                                                             | 8 (0, 26)                                                         | 2 (0, 8)                                                          |
| Hospitalization rate per 100 patient-years, median (IQR)                 | 173.8 (142.3, 209.4) | 177.2 (148.6, 210.2)               | 180 (150, 214.7)                                                       | 168.4 (142.2, 202.5)                                              | 183.2 (154.2, 217.3)                                              |
| Standardized mortality ratio, mean (SD)                                  | 1.0 (0.4)            | 1.0 (0.3)                          | 1.0 (0.4)                                                              | 1.0 (0.4)                                                         | 1.0 (0.3)                                                         |
| ESRD Network Geographic Region, n (%) <sup>f</sup>                       |                      |                                    |                                                                        |                                                                   |                                                                   |
| South                                                                    | 608,050 (41.1)       | 462,676 (22.4)                     | 125,197 (44.3)                                                         | 4,776 (29.1)                                                      | 16,027 (36.6)                                                     |
| Midwest                                                                  | 333,802 (22.6)       | 254,676 (22.4)                     | 65,344 (23.1)                                                          | 4,057 (24.7)                                                      | 9,725 (22.2)                                                      |
| West                                                                     | 298,030 (20.2)       | 226,627 (20.0)                     | 60,661 (21.4)                                                          | 3,704 (22.5)                                                      | 7,038 (16.1)                                                      |
| Northeast                                                                | 238,682 (16.1)       | 192,149 (16.9)                     | 31,683 (11.2)                                                          | 3,894 (23.7)                                                      | 10,956 (25.0)                                                     |
| Metro classification, n (%) <sup>c, g</sup>                              | 1,233,267 (84.2)     | 941,931 (83.7)                     | 240,069 (85.5)                                                         | 13,366 (82.2)                                                     | 37,901 (87.9)                                                     |
| Metro                                                                    |                      |                                    |                                                                        |                                                                   |                                                                   |

| Characteristics <sup>a</sup>                                                                                                                                                                                                                                                                                                                                                                                                                                                                                                                                                                                                                                                                                                                                                                                                                                                                                                                                                                                                                                                                                                                                                                                                                                                                                                                                                                                                                                                                                                                                                                                                                                                                                                                                                                                                                                                                                                                                                                                                                                                                                                                                                                                                                                                  | Total Population | Did not switch dialysis facilities | Changed dialysis facilities and remained within the same profit status | Changed dialysis facilities from for-profit to nonprofit facility | Changed dialysis facilities from nonprofit to for-profit facility |
|-------------------------------------------------------------------------------------------------------------------------------------------------------------------------------------------------------------------------------------------------------------------------------------------------------------------------------------------------------------------------------------------------------------------------------------------------------------------------------------------------------------------------------------------------------------------------------------------------------------------------------------------------------------------------------------------------------------------------------------------------------------------------------------------------------------------------------------------------------------------------------------------------------------------------------------------------------------------------------------------------------------------------------------------------------------------------------------------------------------------------------------------------------------------------------------------------------------------------------------------------------------------------------------------------------------------------------------------------------------------------------------------------------------------------------------------------------------------------------------------------------------------------------------------------------------------------------------------------------------------------------------------------------------------------------------------------------------------------------------------------------------------------------------------------------------------------------------------------------------------------------------------------------------------------------------------------------------------------------------------------------------------------------------------------------------------------------------------------------------------------------------------------------------------------------------------------------------------------------------------------------------------------------|------------------|------------------------------------|------------------------------------------------------------------------|-------------------------------------------------------------------|-------------------------------------------------------------------|
| Distance from assigned facility to nearest transplant center, in miles, median (IQR) <sup>h</sup><br>(319,177 (21.6% missing))                                                                                                                                                                                                                                                                                                                                                                                                                                                                                                                                                                                                                                                                                                                                                                                                                                                                                                                                                                                                                                                                                                                                                                                                                                                                                                                                                                                                                                                                                                                                                                                                                                                                                                                                                                                                                                                                                                                                                                                                                                                                                                                                                | 16.7 (6.1, 53.2) | 17.4 (6, 55)                       | 15.7 (6.5, 49.5)                                                       | 13.9 (4.3, 54.9)                                                  | 12.4 (5, 38)                                                      |
| <p>Abbreviations: BMI, body mass index; ESRD, end stage renal disease; IQR, interquartile range</p> <p><sup>a</sup>Baseline characteristics were obtained at the time the CMS-2728 form is complete</p> <p><sup>b</sup>'Other' race/ethnicity was defined as either Asian, Middle East, Native American, Pacific Islander, or multiracial</p> <p><sup>c</sup>Missing Data: Dialysis type: 7,805 (0.5%); Rural-urban classification: 13,322 (0.9%)</p> <p><sup>d</sup>Calculated as the time on dialysis from the first date of dialysis service to either date of first waitlisting or censor (end of study or death)</p> <p><sup>e</sup>Calculated as the time on dialysis from the first date of dialysis service to either date of first transplant (living or deceased donor transplant) or censor (end of study or death)</p> <p><sup>f</sup>Characteristic was obtained from the Dialysis Facility Report (2013-2016); ESRD Network Geographic Region is defined as Northeast (ESRD Network 1: Connecticut, Massachusetts, Maine, New Hampshire, Rhode Island, Vermont; ESRD Network 2: New York; ESRD Network 3: New Jersey; ESRD Network 4: Delaware, Pennsylvania), South (ESRD Network 5: District of Columbia, Maryland, Virginia, West Virginia; ESRD Network 6: Georgia, North Carolina, South Carolina; ESRD Network 7: Florida; ESRD Network 8: Alabama, Mississippi, Tennessee; ESRD Network 13: Arkansas, Louisiana, Oklahoma; ESRD Network 14: Texas), Midwest (ESRD Network 9/10: Illinois, Indiana, Kentucky, Ohio; ESRD Network 11: Michigan, Minnesota, North Dakota, South Dakota, Wisconsin; ESRD Network 12: Iowa, Kansas, Missouri, Nebraska), and West (ESRD Network 15: Arizona, Colorado, Nevada, New Mexico, Utah, Wyoming; ESRD Network 16: Alaska, Idaho, Montana, Oregon, Washington; ESRD Network 17: Hawaii, Northern California; ESRD Network 18: Southern California)</p> <p><sup>g</sup>Characteristic was obtained from the United States Department of Agriculture Rural and Urban Continuum Code</p> <p><sup>h</sup>Characteristic was calculated using the dialysis facility address from Dialysis Facility Compare (2013-2016) and the nearest transplant center address from the Scientific Registry of Transplant Recipients</p> |                  |                                    |                                                                        |                                                                   |                                                                   |

**eTable 2.** Fully adjusted hierarchical Cox proportional hazard ratios between placement on the deceased donor kidney transplant waitlist, receipt of a living donor kidney transplant, or deceased donor kidney transplant and whether or not a patient changed<sup>a</sup> dialysis facilities and facility profit status. Analysis is stratified by an individual's last dialysis facility change, 2000-2016.

| Fully adjusted model <sup>b</sup> stratified by the last dialysis facility <sup>c</sup> |                                                  |                                                        |                                      |                                      |                                                   |                                                         |
|-----------------------------------------------------------------------------------------|--------------------------------------------------|--------------------------------------------------------|--------------------------------------|--------------------------------------|---------------------------------------------------|---------------------------------------------------------|
| Dialysis Facility Change Status <sup>a</sup>                                            | Nonprofit, small dialysis facility chain (n=435) | Nonprofit, independent owned dialysis facility (n=324) | For-profit large chain - 1 (n=2,239) | For-profit large chain - 2 (n=2,082) | For-profit, small dialysis facility chain (n=997) | For-profit, independent dialysis facility chain (n=434) |
|                                                                                         | HR (95% CI)                                      | HR (95% CI)                                            | HR (95% CI)                          | HR (95% CI)                          | HR (95% CI)                                       | HR (95% CI)                                             |
| <b>Placement on the deceased donor kidney transplant waiting list (n=121,680)</b>       |                                                  |                                                        |                                      |                                      |                                                   |                                                         |
| Did not switch dialysis facilities                                                      | reference [1]                                    | reference [1]                                          | reference [1]                        | reference [1]                        | reference [1]                                     | reference [1]                                           |
| Changed dialysis facilities and remained within the same profit status                  | 0.56 (0.53, 0.59)                                | 0.40 (0.37, 0.43)                                      | 0.02 (0.02, 0.02)                    | 0.04 (0.04, 0.05)                    | 0.01 (0, 0.01)                                    | 0.02 (0.02, 0.03)                                       |
| Changed dialysis facilities from for-profit to non-profit facility                      | 0 <sup>d</sup> (0, 0)                            | 0.01 <sup>d</sup> (0, 0.01)                            | N/A                                  | N/A                                  | N/A                                               | N/A                                                     |
| Changed dialysis facilities from non-profit to for-profit facility                      | N/A                                              | N/A                                                    | 2.64 (2.56, 2.72)                    | 2.84 (2.76, 2.93)                    | 2.11 (2.02, 2.22)                                 | 2.30 (2.15, 2.45)                                       |
| <b>Receipt of a living donor kidney transplant (n=23,762)</b>                           |                                                  |                                                        |                                      |                                      |                                                   |                                                         |
| Did not switch dialysis facilities                                                      | reference [1]                                    | reference [1]                                          | reference [1]                        | reference [1]                        | reference [1]                                     | reference [1]                                           |
| Changed dialysis facilities and remained within the same profit status                  | 0.74 (0.66, 0.83)                                | 0.65 (0.56, 0.76)                                      | 0.29 (0.26, 0.32)                    | 0.34 (0.31, 0.37)                    | 0.30 (0.26, 0.35)                                 | 0.23 (0.19, 0.30)                                       |
| Changed dialysis facilities from for-profit to non-profit facility                      | 0.19 (0.14, 0.25)                                | 0.20 (0.15, 0.27)                                      | N/A                                  | N/A                                  | N/A                                               | N/A                                                     |
| Changed dialysis facilities from non-profit to for-profit facility                      | N/A                                              | N/A                                                    | 1.41 (1.31, 1.52)                    | 1.42 (1.31, 1.53)                    | 1.18 (1.03, 1.35)                                 | 1.39 (1.17, 1.64)                                       |



|                                                                                                                                                                                                                                                                                                                                                                                                                                                                                                                                                                                                                                                                                                                                                                                                                                                                         | Fully adjusted model <sup>b</sup> stratified by the last dialysis facility <sup>c</sup> |                                                        |                                      |                                      |                                                   |                                                         |
|-------------------------------------------------------------------------------------------------------------------------------------------------------------------------------------------------------------------------------------------------------------------------------------------------------------------------------------------------------------------------------------------------------------------------------------------------------------------------------------------------------------------------------------------------------------------------------------------------------------------------------------------------------------------------------------------------------------------------------------------------------------------------------------------------------------------------------------------------------------------------|-----------------------------------------------------------------------------------------|--------------------------------------------------------|--------------------------------------|--------------------------------------|---------------------------------------------------|---------------------------------------------------------|
| Dialysis Facility Change Status <sup>a</sup>                                                                                                                                                                                                                                                                                                                                                                                                                                                                                                                                                                                                                                                                                                                                                                                                                            | Nonprofit, small dialysis facility chain (n=435)                                        | Nonprofit, independent owned dialysis facility (n=324) | For-profit large chain - 1 (n=2,239) | For-profit large chain - 2 (n=2,082) | For-profit, small dialysis facility chain (n=997) | For-profit, independent dialysis facility chain (n=434) |
|                                                                                                                                                                                                                                                                                                                                                                                                                                                                                                                                                                                                                                                                                                                                                                                                                                                                         | HR (95% CI)                                                                             | HR (95% CI)                                            | HR (95% CI)                          | HR (95% CI)                          | HR (95% CI)                                       | HR (95% CI)                                             |
| <b>Receipt of a deceased donor kidney transplant (n=49,290)</b>                                                                                                                                                                                                                                                                                                                                                                                                                                                                                                                                                                                                                                                                                                                                                                                                         |                                                                                         |                                                        |                                      |                                      |                                                   |                                                         |
| Did not switch dialysis facilities                                                                                                                                                                                                                                                                                                                                                                                                                                                                                                                                                                                                                                                                                                                                                                                                                                      | reference [1]                                                                           | reference [1]                                          | reference [1]                        | reference [1]                        | reference [1]                                     | reference [1]                                           |
| Changed dialysis facilities and remained within the same profit status                                                                                                                                                                                                                                                                                                                                                                                                                                                                                                                                                                                                                                                                                                                                                                                                  | 0.56 (0.51, 0.61)                                                                       | 0.42 (0.37, 0.47)                                      | 0.19 (0.17, 0.2)                     | 0.22 (0.20, 0.23)                    | 0.16 (0.14, 0.18)                                 | 0.17 (0.14, 0.20)                                       |
| Changed dialysis facilities from for-profit to non-profit facility                                                                                                                                                                                                                                                                                                                                                                                                                                                                                                                                                                                                                                                                                                                                                                                                      | 0.11 (0.09, 0.14)                                                                       | 0.05 (0.03, 0.07)                                      | N/A                                  | N/A                                  | N/A                                               | N/A                                                     |
| Changed dialysis facilities from non-profit to for-profit facility                                                                                                                                                                                                                                                                                                                                                                                                                                                                                                                                                                                                                                                                                                                                                                                                      | N/A                                                                                     | N/A                                                    | 1.71 (1.63, 1.80)                    | 1.64 (1.56, 1.73)                    | 1.62 (1.50, 1.75)                                 | 1.38 (1.23, 1.55)                                       |
| Abbreviations: CI, confidence interval; HR, hazard ratio; N/A, not applicable                                                                                                                                                                                                                                                                                                                                                                                                                                                                                                                                                                                                                                                                                                                                                                                           |                                                                                         |                                                        |                                      |                                      |                                                   |                                                         |
| <sup>a</sup> Patients' dialysis facility switching was classified based on their first dialysis facility and their last dialysis facility                                                                                                                                                                                                                                                                                                                                                                                                                                                                                                                                                                                                                                                                                                                               |                                                                                         |                                                        |                                      |                                      |                                                   |                                                         |
| <sup>b</sup> Fully adjusted models is stratified by dialysis facility organization and adjusted for patient-level demographics (age, gender, race reported at the time of dialysis start), clinical characteristics (BMI>35 kg/m <sup>2</sup> , attributed cause of end stage renal disease, congestive heart failure, atherosclerotic heart disease, other cardiac disease, cerebrovascular disease, peripheral vascular disease, hypertension, diabetes, chronic obstructive pulmonary disease, tobacco use, cancer reported at the time of dialysis start), and socioeconomic variables (pre-ESRD nephrology care, ESRD Network geographic region, distance from assigned dialysis facility to the nearest transplant center, not informed of transplant due to medical reasons, urban/rural designation, and insurance type reported at the time of dialysis start) |                                                                                         |                                                        |                                      |                                      |                                                   |                                                         |
| <sup>c</sup> The patient was assigned to the last dialysis facility from which they were receiving treatment when the outcome event of interest occurred                                                                                                                                                                                                                                                                                                                                                                                                                                                                                                                                                                                                                                                                                                                |                                                                                         |                                                        |                                      |                                      |                                                   |                                                         |
| <sup>d</sup> Hazard ratios derived from small event numbers should be interpreted carefully                                                                                                                                                                                                                                                                                                                                                                                                                                                                                                                                                                                                                                                                                                                                                                             |                                                                                         |                                                        |                                      |                                      |                                                   |                                                         |

**eTable 3.** Crude and adjusted hierarchical Cox proportional hazard ratios between placement on the deceased donor kidney transplant waitlist, receipt of a living donor kidney transplant, or deceased donor kidney transplant and dialysis facility ownership<sup>a</sup> by patient-level and facility-level characteristics, among ideal kidney transplantation candidates<sup>b</sup>, 2000-2016. (n=454,726)

|                                                                                         | 3-year<br>Cumulative<br>Incidence<br>Difference, %<br>(95% CI) <sup>b</sup> | 5-year<br>Cumulative<br>Incidence<br>Difference, %<br>(95% CI) <sup>b</sup> | 10-year<br>Cumulative<br>Incidence<br>Difference, %<br>(95% CI) <sup>b</sup> | Crude Model<br>(N=454,726) | Adjusted for <sup>d</sup> :              |                                        |                                                               |
|-----------------------------------------------------------------------------------------|-----------------------------------------------------------------------------|-----------------------------------------------------------------------------|------------------------------------------------------------------------------|----------------------------|------------------------------------------|----------------------------------------|---------------------------------------------------------------|
|                                                                                         |                                                                             |                                                                             |                                                                              |                            | Demographics <sup>e</sup><br>(N=454,726) | + Clinical <sup>f</sup><br>(N=454,726) | + Socioeconomic<br>and geographic <sup>g</sup><br>(N=454,726) |
|                                                                                         |                                                                             |                                                                             |                                                                              |                            | HR<br>(95% CI)                           | HR<br>(95% CI)                         | HR<br>(95% CI)                                                |
| <b><i>Placement on the deceased donor kidney transplant waiting list (n=87,238)</i></b> |                                                                             |                                                                             |                                                                              |                            |                                          |                                        |                                                               |
| Nonprofit,<br>small dialysis<br>facility chain                                          | reference                                                                   | reference                                                                   | reference                                                                    | reference<br>[1]           | reference<br>[1]                         | reference<br>[1]                       | reference<br>[1]                                              |
| Nonprofit,<br>independent<br>dialysis facility                                          | 23.0%<br>(22.2%, 23.7%)                                                     | 24.3%<br>(23.6%, 25.1%)                                                     | 25.0%<br>(24.3%, 25.8%)                                                      | 2.24<br>(2.18, 2.31)       | 2.20<br>(2.14, 2.27)                     | 2.23<br>(2.17, 2.30)                   | 2.12<br>(2.06, 2.19)                                          |
| For-profit large<br>chain - 1                                                           | -11.4%<br>(-11.9%, -10.9%)                                                  | -11.6%<br>(-12.1%, -11.1%)                                                  | -11.1%<br>(-11.7%, -10.6%)                                                   | 0.47<br>(0.45, 0.48)       | 0.48<br>(0.47, 0.49)                     | 0.48<br>(0.47, 0.50)                   | 0.49<br>(0.47, 0.50)                                          |
| For-profit large<br>chain - 2                                                           | -12.5%<br>(-13.0%, -12.0%)                                                  | -13.0%<br>(-13.5%, -12.4%)                                                  | -12.7%<br>(-13.3%, -12.2%)                                                   | 0.44<br>(0.42, 0.45)       | 0.45<br>(0.44, 0.47)                     | 0.48<br>(0.47, 0.49)                   | 0.48<br>(0.46, 0.49)                                          |
| For-profit,<br>small dialysis<br>facility chain                                         | -11.7%<br>(-12.3%, -11.2%)                                                  | -12.1%<br>(-12.6%, -11.5%)                                                  | -11.9%<br>(-12.4%, -11.3%)                                                   | 0.46<br>(0.45, 0.48)       | 0.48<br>(0.46, 0.49)                     | 0.49<br>(0.47, 0.50)                   | 0.49<br>(0.48, 0.51)                                          |
| For-profit,<br>independent<br>dialysis facility                                         | -10.2% (-10.8%, -<br>9.6%)                                                  | -10.2%<br>(-10.9%, -9.5%)                                                   | -9.7%<br>(-10.4%, -9.0%)                                                     | 0.52<br>(0.50, 0.54)       | 0.54<br>(0.51, 0.56)                     | 0.53<br>(0.50, 0.55)                   | 0.53<br>(0.51, 0.56)                                          |
| All nonprofit<br>facilities                                                             | reference                                                                   | reference                                                                   | reference                                                                    | reference<br>[1]           | reference<br>[1]                         | reference<br>[1]                       | reference<br>[1]                                              |
| All for-profit<br>facilities                                                            | -22.9%<br>(-23.3%, -22.5%)                                                  | -23.9%<br>(-24.3%, -23.5%)                                                  | -23.9%<br>(-24.3%, -23.5%)                                                   | 0.29<br>(0.29, 0.30)       | 0.31<br>(0.30, 0.31)                     | 0.31<br>(0.31, 0.32)                   | 0.33<br>(0.32, 0.33)                                          |

|                                                                      | 3-year<br>Cumulative<br>Incidence<br>Difference, %<br>(95% CI) <sup>b</sup> | 5-year<br>Cumulative<br>Incidence<br>Difference, %<br>(95% CI) <sup>b</sup> | 10-year<br>Cumulative<br>Incidence<br>Difference, %<br>(95% CI) <sup>b</sup> | Crude Model<br>(N=454,726) | Adjusted for <sup>d</sup> :              |                                            |                                                               |
|----------------------------------------------------------------------|-----------------------------------------------------------------------------|-----------------------------------------------------------------------------|------------------------------------------------------------------------------|----------------------------|------------------------------------------|--------------------------------------------|---------------------------------------------------------------|
|                                                                      |                                                                             |                                                                             |                                                                              |                            | Demographics <sup>e</sup><br>(N=454,726) | + Clinical <sup>f</sup><br>(N=454,726<br>) | + Socioeconomic<br>and geographic <sup>g</sup><br>(N=454,726) |
|                                                                      |                                                                             |                                                                             |                                                                              | HR<br>(95% CI)             | HR<br>(95% CI)                           | HR<br>(95% CI)                             | HR<br>(95% CI)                                                |
| <b><i>Receipt of a living donor kidney transplant (n=18,890)</i></b> |                                                                             |                                                                             |                                                                              |                            |                                          |                                            |                                                               |
| Nonprofit, small<br>dialysis facility<br>chain                       | reference                                                                   | reference                                                                   | reference                                                                    | reference<br>[1]           | reference<br>[1]                         | reference<br>[1]                           | reference<br>[1]                                              |
| Nonprofit,<br>independent<br>dialysis facility                       | 3.2%<br>(2.8%, 3.6%)                                                        | 3.9%<br>(3.4%, 4.3%)                                                        | 4.4%<br>(3.9%, 4.8%)                                                         | 1.41<br>(1.32, 1.51)       | 1.37<br>(1.28, 1.46)                     | 1.32<br>(1.23, 1.41)                       | 1.11<br>(1.04, 1.18)                                          |
| For-profit large<br>chain - 1                                        | -2.6%<br>(-2.9%, -2.4%)                                                     | -2.9%<br>(-3.2%, -2.6%)                                                     | -2.9%<br>(-3.2%, -2.7%)                                                      | 0.51<br>(0.48, 0.54)       | 0.56<br>(0.53, 0.59)                     | 0.57<br>(0.54, 0.61)                       | 0.58<br>(0.54, 0.61)                                          |
| For-profit large<br>chain - 2                                        | -2.6%<br>(-2.9%, -2.3%)                                                     | -2.9%<br>(-3.2%, -2.6%)                                                     | -3.0%<br>(-3.3%, -2.7%)                                                      | 0.53<br>(0.50, 0.57)       | 0.57<br>(0.53, 0.60)                     | 0.61<br>(0.57, 0.64)                       | 0.58<br>(0.55, 0.62)                                          |
| For-profit, small<br>dialysis facility<br>chain                      | -3.0%<br>(-3.3%, -2.7%)                                                     | -3.3%<br>(-3.6%, -3.0%)                                                     | -3.4%<br>(-3.8%, -3.1%)                                                      | 0.45<br>(0.42, 0.49)       | 0.51<br>(0.48, 0.55)                     | 0.53<br>(0.50, 0.57)                       | 0.59<br>(0.55, 0.64)                                          |
| For-profit,<br>independent<br>dialysis facility                      | -2.3%<br>(-2.6%, -2.0%)                                                     | -2.6%<br>(-3.0%, -2.2%)                                                     | -2.7%<br>(-3.0%, -2.3%)                                                      | 0.58<br>(0.53, 0.63)       | 0.67<br>(0.62, 0.73)                     | 0.69<br>(0.63, 0.76)                       | 0.69<br>(0.64, 0.76)                                          |
| All nonprofit<br>facilities                                          | reference                                                                   | reference                                                                   | reference                                                                    | reference<br>[1]           | reference<br>[1]                         | reference<br>[1]                           | reference<br>[1]                                              |
| All for-profit<br>facilities                                         | -4.2%<br>(-4.4%, -4.0%)                                                     | -4.8%<br>(-5.0%, -4.6%)                                                     | -5.1%<br>(-5.4%, -4.9%)                                                      | 0.43<br>(0.41, 0.44)       | 0.47<br>(0.46, 0.49)                     | 0.51<br>(0.49, 0.53)                       | 0.56<br>(0.54, 0.58)                                          |

|                                                                        | 3-year<br>Cumulative<br>Incidence<br>Difference, %<br>(95% CI) <sup>b</sup> | 5-year<br>Cumulative<br>Incidence<br>Difference, %<br>(95% CI) <sup>b</sup> | 10-year<br>Cumulative<br>Incidence<br>Difference, %<br>(95%CI) <sup>b</sup> | Crude Model<br>(N=454,726) | Adjusted for <sup>d</sup> :              |                                        |                                                               |
|------------------------------------------------------------------------|-----------------------------------------------------------------------------|-----------------------------------------------------------------------------|-----------------------------------------------------------------------------|----------------------------|------------------------------------------|----------------------------------------|---------------------------------------------------------------|
|                                                                        |                                                                             |                                                                             |                                                                             |                            | Demographics <sup>e</sup><br>(N=454,726) | + Clinical <sup>f</sup><br>(N=454,726) | + Socioeconomic<br>and geographic <sup>g</sup><br>(N=454,726) |
|                                                                        |                                                                             |                                                                             |                                                                             |                            | HR<br>(95% CI)                           | HR<br>(95% CI)                         | HR<br>(95% CI)                                                |
| <b><i>Receipt of a deceased donor kidney transplant (n=38,210)</i></b> |                                                                             |                                                                             |                                                                             |                            |                                          |                                        |                                                               |
| Nonprofit,<br>small dialysis<br>facility chain                         | reference                                                                   | reference                                                                   | reference                                                                   | reference<br>[1]           | reference<br>[1]                         | reference<br>[1]                       | reference<br>[1]                                              |
| Nonprofit,<br>independent<br>dialysis facility                         | 3.1%<br>(2.7%, 3.5%)                                                        | 7.4%<br>(6.9%, 8.0%)                                                        | 13.5%<br>(12.8%, 14.1%)                                                     | 1.37<br>(0.26, 1.48)       | 1.36<br>(1.25, 1.47)                     | 1.45<br>(1.34, 1.58)                   | 1.35<br>(1.25, 1.47)                                          |
| For-profit large<br>chain - 1                                          | -2.9%<br>(-3.1%, -2.6%)                                                     | -4.9%<br>(-5.2%, -4.5%)                                                     | -6.2%<br>(-6.6%, -5.8%)                                                     | 0.53<br>(0.49, 0.57)       | 0.57<br>(0.53, 0.62)                     | 0.57<br>(0.53, 0.62)                   | 0.57<br>(0.53, 0.61)                                          |
| For-profit large<br>chain - 2                                          | -2.8%<br>(-3.1%, -2.5%)                                                     | -4.9%<br>(-5.3%, -4.6%)                                                     | -6.9%<br>(-7.3%, -6.5%)                                                     | 0.58<br>(0.54, 0.62)       | 0.60<br>(0.55, 0.64)                     | 0.63<br>(0.59, 0.68)                   | 0.61<br>(0.56, 0.65)                                          |
| For-profit,<br>small dialysis<br>facility chain                        | -3.0%<br>(-3.2%, -2.7%)                                                     | -5.1%<br>(-5.5%, -4.7%)                                                     | -6.9%<br>(-7.4%, -6.4%)                                                     | 0.53<br>(0.49, 0.58)       | 0.59<br>(0.54, 0.64)                     | 0.59<br>(.54, 0.64)                    | 0.61<br>(0.56, 0.67)                                          |
| For-profit,<br>independent<br>dialysis facility                        | -3.1%<br>(-3.4%, -2.8%)                                                     | -5.3%<br>(-5.8%, -4.9%)                                                     | -6.1%<br>(-6.6%, -5.5%)                                                     | 0.49<br>(0.44, 0.55)       | 0.56<br>(0.50, 0.63)                     | 0.58<br>(0.52, 0.65)                   | 0.60<br>(0.53, 0.67)                                          |

|                                                                        | 3-year<br>Cumulative<br>Incidence<br>Difference, %<br>(95% CI) <sup>b</sup> | 5-year<br>Cumulative<br>Incidence<br>Difference, %<br>(95% CI) <sup>b</sup> | 10-year<br>Cumulative<br>Incidence<br>Difference, %<br>(95%CI) <sup>b</sup> | Crude Model<br>(N=454,726) | Adjusted for <sup>d</sup> :              |                                        |                                                               |
|------------------------------------------------------------------------|-----------------------------------------------------------------------------|-----------------------------------------------------------------------------|-----------------------------------------------------------------------------|----------------------------|------------------------------------------|----------------------------------------|---------------------------------------------------------------|
|                                                                        |                                                                             |                                                                             |                                                                             |                            | Demographics <sup>e</sup><br>(N=454,726) | + Clinical <sup>f</sup><br>(N=454,726) | + Socioeconomic<br>and geographic <sup>g</sup><br>(N=454,726) |
|                                                                        |                                                                             |                                                                             |                                                                             | HR<br>(95% CI)             | HR<br>(95% CI)                           | HR<br>(95% CI)                         | HR<br>(95% CI)                                                |
| <b><i>Receipt of a deceased donor kidney transplant (n=38,210)</i></b> |                                                                             |                                                                             |                                                                             |                            |                                          |                                        |                                                               |
| All nonprofit facilities                                               | reference                                                                   | reference                                                                   | reference                                                                   | reference<br>[1]           | reference<br>[1]                         | reference<br>[1]                       | reference<br>[1]                                              |
| All for-profit facilities                                              | -4.4%<br>(-4.6%, -4.2%)                                                     | -8.5%<br>(-8.8%, -8.3%)                                                     | -13.1%<br>(-13.4%, -12.7%)                                                  | 0.46<br>(0.44, 0.48)       | 0.50<br>(0.47, 0.52)                     | 0.49<br>(0.47, 0.52)                   | 0.51<br>(0.48, 0.53)                                          |

Abbreviations:CI, confidence interval; HR, hazard ratio

<sup>a</sup>Patients were assigned to the last dialysis facility from which they were receiving treatment when the outcome event of interest occurred

<sup>b</sup>Ideal kidney transplant candidate cohort excluded patients age>65 years, and diagnosed with peripheral vascular disease, coronary heart failure, cerebrovascular disease, or reported by dialysis facility staff to not be assessed for transplantation (via CMS-2728 form) due to medical reasons.

<sup>c</sup>Adjusted for age, gender, and race reported at the time of dialysis start; Events of interest (placement on the deceased donor waitlist, receipt of a living donor kidney transplant and receipt of a deceased donor kidney transplant) and person-time (in 100,000 person-years) were summed up by covariate patterns. Negative binomial model were performed to calculate the risk difference and its 95% confidence intervals between types of facilities

<sup>d</sup>Each model is adjusted for the covariates in the previous model in addition to the stated covariates

<sup>e</sup>Demographic variables include: age, gender, and race reported at the time of dialysis start

<sup>f</sup>Clinical variables include: BMI>35 kg/m<sup>2</sup>, attributed cause of ESRD, congestive heart failure, atherosclerotic heart disease, other cardiac disease, cerebrovascular disease, peripheral vascular disease, hypertension, diabetes, chronic obstructive pulmonary disease, tobacco use, cancer, and dialysis type

<sup>g</sup>Socioeconomic variables include: ESRD Network geographic region of assigned facility, pre-ESRD nephrology care reported at the time of dialysis start, insurance type reported at the time of dialysis start, facility rural-urban classification, and distance from assigned dialysis facility to the nearest transplant center; Multiple imputation was used to handle missing data: Insurance coverage: 17,990 (4.0%); Type of dialysis: 4,374 (1.0%); Distance from assigned dialysis facility to nearest transplant center: 96,273 (21.1%); Rural-urban classification: 3,411 (0.8%)

**eTable 4.** Fully adjusted hierarchical Cox proportional hazard ratios between placement on the deceased donor kidney transplant waitlist, receipt of a living donor kidney transplant, or deceased donor kidney transplant by patient-level and facility-level characteristics, stratified by end stage renal disease network region, 2000-2016.

|                                                                                          | Fully Adjusted Model <sup>a</sup> | Fully adjusted model stratified by End Stage Renal Disease Network, U.S. Geographic Region |                                   |                                     |                                  |
|------------------------------------------------------------------------------------------|-----------------------------------|--------------------------------------------------------------------------------------------|-----------------------------------|-------------------------------------|----------------------------------|
|                                                                                          |                                   | Northeast <sup>b</sup><br>(n=238,682)                                                      | South <sup>c</sup><br>(n=608,050) | Midwest <sup>d</sup><br>(n=333,802) | West <sup>e</sup><br>(n=298,030) |
|                                                                                          | HR<br>(95% CI)                    | HR<br>(95% CI)                                                                             | HR<br>(95% CI)                    | HR<br>(95% CI)                      | HR<br>(95% CI)                   |
| <b><i>Placement on the deceased donor kidney transplant waiting list (n=121,680)</i></b> |                                   |                                                                                            |                                   |                                     |                                  |
| Nonprofit, small dialysis facility chain                                                 | reference<br>[1]                  | reference<br>[1]                                                                           | reference<br>[1]                  | reference<br>[1]                    | reference<br>[1]                 |
| Nonprofit, independent owned dialysis facility                                           | 2.36<br>(2.31, 2.42)              | 2.85<br>(2.63, 3.08)                                                                       | 1.88<br>(1.80, 1.96)              | 2.69<br>(2.55, 2.83)                | 4.15<br>(3.92, 4.40)             |
| For-profit large chain - 1                                                               | 0.57<br>(0.56, 0.58)              | 0.90<br>(0.83, 0.98)                                                                       | 0.30<br>(0.29, 0.31)              | 0.47<br>(0.45, 0.50)                | 0.86<br>(0.82, 0.91)             |
| For-profit large chain - 2                                                               | 0.54<br>(0.53, 0.55)              | 0.84<br>(0.78, 0.92)                                                                       | 0.31<br>(0.30, 0.33)              | 0.47<br>(0.44, 0.49)                | 0.77<br>(0.72, 0.81)             |
| For-profit, small dialysis facility chain                                                | 0.56<br>(0.54, 0.57)              | 0.87<br>(0.79, 0.96)                                                                       | 0.31<br>(0.30, 0.33)              | 0.43<br>(0.39, 0.47)                | 0.84<br>(0.80, 0.89)             |
| For-profit independent dialysis facility chain                                           | 0.60<br>(0.58, 0.61)              | 0.79<br>(0.72, 0.87)                                                                       | 0.30<br>(0.28, 0.32)              | 0.91<br>(0.84, 0.98)                | 0.66<br>(0.60, 0.71)             |
| All nonprofit facilities                                                                 | reference<br>[1]                  | reference<br>[1]                                                                           | reference<br>[1]                  | reference<br>[1]                    | reference<br>[1]                 |
| All for-profit facilities                                                                | 0.36<br>(0.35, 0.36)              | 0.36<br>(0.35, 0.38)                                                                       | 0.24<br>(0.23, 0.24)              | 0.28<br>(0.27, 0.28)                | 0.45<br>(0.44, 0.47)             |
| <b><i>Receipt of a living donor kidney transplant (n=23,762)</i></b>                     |                                   |                                                                                            |                                   |                                     |                                  |
| Nonprofit, small dialysis facility chain                                                 | reference<br>[1]                  | reference<br>[1]                                                                           | reference<br>[1]                  | reference<br>[1]                    | reference<br>[1]                 |
| Nonprofit, independent owned dialysis facility                                           | 1.33<br>(1.26, 1.40)              | 1.42<br>(1.21, 1.67)                                                                       | 1.18<br>(1.05, 1.33)              | 1.02<br>(0.92, 1.12)                | 1.65<br>(1.43, 1.90)             |
| For-profit large chain - 1                                                               | 0.61<br>(0.58, 0.63)              | 0.84<br>(0.71, 0.99)                                                                       | 0.51<br>(0.46, 0.56)              | 0.48<br>(0.44, 0.52)                | 0.68<br>(0.61, 0.76)             |
| For-profit large chain - 2                                                               | 0.60<br>(0.57, 0.63)              | 0.75<br>(0.64, 0.89)                                                                       | 0.53<br>(0.48, 0.58)              | 0.46<br>(0.42, 0.51)                | 0.74<br>(0.65, 0.84)             |

|                                           |                      |                      |                      |                      |                      |
|-------------------------------------------|----------------------|----------------------|----------------------|----------------------|----------------------|
| For-profit, small dialysis facility chain | 0.61<br>(0.58, 0.64) | 0.80<br>(0.66, 0.97) | 0.49<br>(0.44, 0.54) | 0.35<br>(0.30, 0.42) | 0.86<br>(0.76, 0.97) |
|-------------------------------------------|----------------------|----------------------|----------------------|----------------------|----------------------|

|                                                                        | Fully Adjusted Model <sup>a</sup> | Fully adjusted model stratified by End Stage Renal Disease Network, U.S. Geographic Region |                                   |                                     |                                  |
|------------------------------------------------------------------------|-----------------------------------|--------------------------------------------------------------------------------------------|-----------------------------------|-------------------------------------|----------------------------------|
|                                                                        |                                   | Northeast <sup>b</sup><br>(n=238,682)                                                      | South <sup>c</sup><br>(n=608,050) | Midwest <sup>d</sup><br>(n=333,802) | West <sup>e</sup><br>(n=298,030) |
|                                                                        | HR<br>(95% CI)                    | HR<br>(95% CI)                                                                             | HR<br>(95% CI)                    | HR<br>(95% CI)                      | HR<br>(95% CI)                   |
| <b><i>Receipt of a living donor kidney transplant (n=23,762)</i></b>   |                                   |                                                                                            |                                   |                                     |                                  |
| For-profit independent dialysis facility chain                         | 0.70<br>(0.65, 0.74)              | 0.85<br>(0.70, 1.03)                                                                       | 0.50<br>(0.43, 0.58)              | 0.81<br>(0.71, 0.92)                | 0.77<br>(0.64, 0.93)             |
| All nonprofit facilities                                               | reference<br>[1]                  | reference<br>[1]                                                                           | reference<br>[1]                  | reference<br>[1]                    | reference<br>[1]                 |
| All for-profit facilities                                              | 0.52<br>(0.51, 0.54)              | 0.61<br>(0.56, 0.65)                                                                       | 0.48<br>(0.45, 0.51)              | 0.48<br>(0.45, 0.51)                | 0.61<br>(0.57, 0.67)             |
| <b><i>Receipt of a deceased donor kidney transplant (n=49,290)</i></b> |                                   |                                                                                            |                                   |                                     |                                  |
| Nonprofit, small dialysis facility chain                               | reference<br>[1]                  | reference<br>[1]                                                                           | reference<br>[1]                  | reference<br>[1]                    | reference<br>[1]                 |
| Nonprofit, independent owned dialysis facility                         | 1.71<br>(1.66, 1.77)              | 2.31<br>(1.81, 2.94)                                                                       | 1.60<br>(1.43, 1.79)              | 1.64<br>(1.43, 1.89)                | 1.14<br>(0.94, 1.39)             |
| For-profit large chain - 1                                             | 0.60<br>(0.58, 0.62)              | 1.08<br>(0.85, 1.38)                                                                       | 0.41<br>(0.37, 0.45)              | 0.71<br>(0.62, 0.80)                | 0.65<br>(0.57, 0.75)             |
| For-profit large chain - 2                                             | 0.59<br>(0.57, 0.61)              | 0.97<br>(0.76, 1.24)                                                                       | 0.46<br>(0.42, 0.50)              | 0.71<br>(0.63, 0.81)                | 0.64<br>(0.54, 0.75)             |
| For-profit, small dialysis facility chain                              | 0.60<br>(0.58, 0.62)              | 1.00<br>(0.76, 1.33)                                                                       | 0.44<br>(0.40, 0.49)              | 0.71<br>(0.58, 0.87)                | 0.81<br>(0.70, 0.94)             |
| For-profit independent dialysis facility chain                         | 0.59<br>(0.56, 0.62)              | 0.79<br>(0.59, 1.07)                                                                       | 0.41<br>(0.35, 0.48)              | 0.92<br>(0.76, 1.12)                | 0.64<br>(0.50, 0.81)             |



|                                                                        | Fully Adjusted Model <sup>a</sup> | Fully adjusted model stratified by End Stage Renal Disease Network, U.S. Geographic Region |                                   |                                     |                                  |
|------------------------------------------------------------------------|-----------------------------------|--------------------------------------------------------------------------------------------|-----------------------------------|-------------------------------------|----------------------------------|
|                                                                        |                                   | Northeast <sup>b</sup><br>(n=238,682)                                                      | South <sup>c</sup><br>(n=608,050) | Midwest <sup>d</sup><br>(n=333,802) | West <sup>e</sup><br>(n=298,030) |
|                                                                        | HR<br>(95% CI)                    | HR<br>(95% CI)                                                                             | HR<br>(95% CI)                    | HR<br>(95% CI)                      | HR<br>(95% CI)                   |
| <b><i>Receipt of a deceased donor kidney transplant (n=49,290)</i></b> |                                   |                                                                                            |                                   |                                     |                                  |
| All nonprofit facilities                                               | reference<br>[1]                  | reference<br>[1]                                                                           | reference<br>[1]                  | reference<br>[1]                    | reference<br>[1]                 |
| All for-profit facilities                                              | 0.44<br>(0.44, 0.45)              | 0.50<br>(0.45, 0.55)                                                                       | 0.36<br>(0.33, 0.38)              | 0.53<br>(0.49, 0.57)                | 0.66<br>(0.60, 0.74)             |

Abbreviations: CI, confidence interval; ESRD, end stage renal disease; HR, hazard ratio

<sup>a</sup>Fully adjusted models is adjusted for dialysis facility organization, and patient-level demographics (age, gender, race reported at the time of dialysis start), clinical characteristics (BMI>35 kg/m<sup>2</sup>, attributed cause of end stage renal disease, congestive heart failure, atherosclerotic heart disease, other cardiac disease, cerebrovascular disease, peripheral vascular disease, hypertension, diabetes, chronic obstructive pulmonary disease, tobacco use, cancer reported at the time of dialysis start), and socioeconomic variables (ESRD Network geographic region, distance from assigned dialysis facility to the nearest transplant center, not informed of transplant due to medical reasons, urban/rural designation, and insurance type)

<sup>b</sup>ESRD Network Geographic Region Northeast: ESRD Network 1 (Connecticut, Massachusetts, Maine, New Hampshire, Rhode Island, Vermont), ESRD Network 2 (New York; ESRD Network 3: New Jersey), ESRD Network 4 (Delaware, Pennsylvania)

<sup>c</sup>ESRD Network Geographic Region South: ESRD Network 5 (District of Columbia, Maryland, Virginia, West Virginia), ESRD Network 6 (Georgia, North Carolina, South Carolina), ESRD Network 7 (Florida), ESRD Network 8 (Alabama, Mississippi, Tennessee; ESRD Network 13: Arkansas, Louisiana, Oklahoma; ESRD Network 14: Texas)

<sup>d</sup>ESRD Network Geographic Region Midwest: (ESRD Network 9/10: Illinois, Indiana, Kentucky, Ohio), ESRD Network 11 (Michigan, Minnesota, North Dakota, South Dakota, Wisconsin); ESRD Network 12: Iowa, Kansas, Missouri, Nebraska)

<sup>e</sup>ESRD Network Geographic Region West: ESRD Network 15 (Arizona, Colorado, Nevada, New Mexico, Utah, Wyoming), ESRD Network 16 (Alaska, Idaho, Montana, Oregon, Washington), ESRD Network 17 (Hawaii, Northern California), ESRD Network 18 (Southern California)

**eTable 5.** Crude and adjusted hierarchical Cox proportional hazard ratios between placement on the deceased donor kidney transplant waitlist, receipt of a living donor kidney transplant, or deceased donor kidney transplant by patient-level and facility-level characteristics for dialysis facilities that are (vs. are not) affiliated with transplant centers<sup>a</sup>, 2000-2016.

|                                                                                          | Crude Model       | Adjusted for <sup>b</sup> : |                         |                                             |
|------------------------------------------------------------------------------------------|-------------------|-----------------------------|-------------------------|---------------------------------------------|
|                                                                                          |                   | Demographics <sup>c</sup>   | + Clinical <sup>d</sup> | + Socioeconomic and geographic <sup>e</sup> |
|                                                                                          | HR (95% CI)       | HR (95% CI)                 | HR (95% CI)             | HR (95% CI)                                 |
| <b><i>Placement on the deceased donor kidney transplant waiting list (n=121,680)</i></b> |                   |                             |                         |                                             |
| Nonprofit, transplant center affiliated                                                  | reference [1]     | reference [1]               | reference [1]           | reference [1]                               |
| Nonprofit, not transplant center affiliated                                              | 0.05 (0.05, 0.06) | 0.08 (0.08, 0.08)           | 0.09 (0.09, 0.09)       | 0.10 (0.09, 0.10)                           |
| For-profit, transplant center affiliated                                                 | 0.68 (0.63, 0.72) | 0.75 (0.71, 0.81)           | 0.75 (0.70, 0.80)       | 0.81 (0.76, 0.87)                           |
| For-profit, not transplant center affiliated                                             | 0.05 (0.04, 0.05) | 0.07 (0.07, 0.07)           | 0.07 (0.07, 0.07)       | 0.08 (0.08, 0.08)                           |
| <b><i>Receipt of a living donor kidney transplant (n=23,762)</i></b>                     |                   |                             |                         |                                             |
| Nonprofit, transplant-center affiliated                                                  | reference [1]     | reference [1]               | reference [1]           | reference [1]                               |
| Nonprofit, not transplant center affiliated                                              | 0.18 (0.17, 0.19) | 0.30 (0.28, 0.32)           | 0.36 (0.34, 0.38)       | 0.43 (0.41, 0.46)                           |
| For-profit, transplant center affiliated                                                 | 1.33 (1.15, 1.54) | 1.73 (1.50, 2.01)           | 1.87 (1.62, 2.17)       | 1.76 (1.51, 2.04)                           |
| For-profit, not transplant center affiliated                                             | 0.12 (0.12, 0.13) | 0.22 (0.21, 0.23)           | 0.26 (0.25, 0.27)       | 0.32 (0.31, 0.34)                           |
| <b><i>Receipt of a deceased donor kidney transplant (n=49,290)</i></b>                   |                   |                             |                         |                                             |
| Nonprofit, transplant-center affiliated                                                  | reference [1]     | reference [1]               | reference [1]           | reference [1]                               |
| Nonprofit, not transplant center affiliated                                              | 0.17 (0.16, 0.18) | 0.27 (0.26, 0.29)           | 0.29 (0.27, 0.31)       | 0.34 (0.32, 0.37)                           |
| For-profit, transplant center affiliated                                                 | 0.68 (0.53, 0.86) | 0.85 (0.67, 1.07)           | 0.88 (0.69, 1.12)       | 0.86 (0.67, 1.09)                           |
| For-profit, not transplant center affiliated                                             | 0.13 (0.12, 0.13) | 0.21 (0.20, 0.22)           | 0.22 (0.21, 0.23)       | 0.25 (0.24, 0.26)                           |

Abbreviations: CI, confidence interval; HR, hazard ratio

<sup>a</sup>Dialysis facility affiliation with transplant centers was captured using the United Network of Organ Sharing transplant center id provided within the United States Renal Data Systems 2017 crosswalk file

<sup>b</sup>Each model is adjusted for the covariates in the previous model in addition to the stated covariates

<sup>c</sup>Demographic variables include age, gender, and race reported at the time of dialysis start

<sup>d</sup>Clinical variables include BMI>35 kg/m<sup>2</sup>, attributable cause of ESRD, congestive heart failure, atherosclerotic heart disease, other cardiac disease, cerebrovascular disease, peripheral vascular disease, hypertension, diabetes, chronic obstructive pulmonary disease, tobacco use, cancer reported at the time of dialysis start, and dialysis type

<sup>e</sup>Socioeconomic and geographic variables include: ESRD Network geographic region of assigned facility, insurance type reported at the time of dialysis start, facility rural-urban classification, distance from assigned dialysis facility to the nearest transplant center, and not informed of transplant due to medical reasons

**eTable 6.** Crude and adjusted hierarchical Cox proportional hazard ratios between placement on the deceased donor kidney transplant waitlist, receipt of a living donor kidney transplant, or deceased donor kidney transplant by patient-level and facility-level characteristics for dialysis facilities that are (vs. are not) affiliated with hospitals<sup>a</sup>, 2000-2016

|                                                                                          | Crude Model       | Adjusted for <sup>b</sup> : |                         |                                             |
|------------------------------------------------------------------------------------------|-------------------|-----------------------------|-------------------------|---------------------------------------------|
|                                                                                          |                   | Demographics <sup>c</sup>   | + Clinical <sup>d</sup> | + Socioeconomic and geographic <sup>e</sup> |
|                                                                                          | HR (95% CI)       | HR (95% CI)                 | HR (95% CI)             | HR (95% CI)                                 |
| <b><i>Placement on the deceased donor kidney transplant waiting list (n=121,680)</i></b> |                   |                             |                         |                                             |
| Nonprofit, hospital-affiliated                                                           | reference [1]     | reference [1]               | reference [1]           | reference [1]                               |
| Nonprofit, not hospital-affiliated                                                       | 0.11 (0.10, 0.11) | 0.14 (0.13, 0.14)           | 0.16 (0.15, 0.16)       | 0.17 (0.17, 0.18)                           |
| For-profit, hospital-affiliated                                                          | 0.88 (0.82, 0.93) | 0.89 (0.83, 0.95)           | 0.91 (0.85, 0.97)       | 0.93 (0.87, 0.99)                           |
| For-profit, not hospital-affiliated                                                      | 0.09 (0.09, 0.09) | 0.11 (0.11, 0.12)           | 0.13 (0.12, 0.13)       | 0.14, 0.13, 0.14)                           |
| <b><i>Receipt of a living donor kidney transplant (n=23,762)</i></b>                     |                   |                             |                         |                                             |
| Nonprofit, hospital-affiliated                                                           | reference [1]     | reference [1]               | reference [1]           | reference [1]                               |
| Nonprofit, not hospital-affiliated                                                       | 0.24 (0.23, 0.26) | 0.36 (0.34, 0.38)           | 0.43 (0.40, 0.45)       | 0.51 (0.48, 0.54)                           |
| For-profit, hospital-affiliated                                                          | 1.42 (1.23, 1.64) | 1.72 (1.49, 1.98)           | 1.85 (1.60, 2.13)       | 1.72 (1.49, 1.98)                           |
| For-profit, not hospital-affiliated                                                      | 0.17 (0.17, 0.18) | 0.27 (0.26, 0.28)           | 0.31 (0.30, 0.33)       | 0.37 (0.36, 0.39)                           |
| <b><i>Receipt of a deceased donor kidney transplant (n=49,290)</i></b>                   |                   |                             |                         |                                             |
| Nonprofit, hospital-affiliated                                                           | reference [1]     | reference [1]               | reference [1]           | reference [1]                               |
| Nonprofit, not hospital-affiliated                                                       | 0.25 (0.23, 0.26) | 0.35 (0.32, 0.37)           | 0.38 (0.35, 0.41)       | 0.43 (0.40, 0.47)                           |
| For-profit, hospital-affiliated                                                          | 0.79 (0.63, 0.99) | 0.92 (0.74, 1.15)           | 1.01 (0.81, 1.26)       | 0.96 (0.77, 0.120)                          |
| For-profit, not hospital-affiliated                                                      | 0.18 (0.18, 0.19) | 0.27 (0.26, 0.28)           | 0.28 (0.27, 0.30)       | 0.31 (0.29, 0.32)                           |

Abbreviations: CI, confidence interval; HR, hazard ratio

<sup>a</sup>Dialysis facility affiliation with transplant centers was captured using the UNOS transplant center id provided within the USRDS 2017 crosswalk file

<sup>b</sup>Each model is adjusted for the covariates in the previous model in addition to the stated covariates

<sup>c</sup>Demographic variables include age, gender, race reported at the time of dialysis start

<sup>d</sup>Clinical variables include BMI>35 kg/m<sup>2</sup>, attributable cause of ESRD, congestive heart failure, atherosclerotic heart disease, other cardiac disease, cerebrovascular disease, peripheral vascular disease, hypertension, diabetes, chronic obstructive pulmonary disease, tobacco use, cancer reported at the time of dialysis start, and dialysis modality

<sup>e</sup>Socioeconomic and geographic variables include: ESRD Network geographic region of assigned facility, insurance type reported at the time of dialysis start, facility rural-urban classification, distance from assigned dialysis facility to the nearest transplant center, and not informed of transplant

due to medical reasons
